# Supplementary material for: In Silico Screening of Available Drugs Targeting Non-Small Cell Lung Cancer Targets: A Drug Repurposing Approach
Source: MDPI journal article supplement (doi:10.3390/pharmaceutics14010059), 2021-12-28
Supplement: s1 [file s1]

# Supplementary Materials: In Silico Screening of Available Drugs Targeting Non-Small Cell Lung Cancer Targets: A Drug Repurposing Approach

**Table S1.** Predicted pKa values of each amino acid residues at different conditions.

| Amino Acid Residues | pKa (Before Minimization) | pKa (After Minimization) | Corrected Values |
|---------------------|---------------------------|--------------------------|------------------|
| GLU39               | 7.94                      | 7.92                     | 0.02             |
| GLU39               | 4.49                      | 4.55                     | −0.06            |
| GLU41               | 4.55                      | 4.56                     | −0.01            |
| GLU44               | 4.88                      | 4.89                     | −0.01            |
| ARG47               | 12.67                     | 12.51                    | 0.16             |
| LYS48               | 10.55                     | 10.56                    | −0.01            |
| ARG49               | 12.9                      | 12.83                    | 0.07             |
| GLU51               | 4.12                      | 4.27                     | −0.15            |
| LYS57               | 10.06                     | 9.84                     | 0.22             |
| LYS59               | 10.31                     | 10.35                    | −0.04            |
| GLU62               | 4.56                      | 4.55                     | 0.01             |
| LYS64               | 11.94                     | 11.72                    | 0.22             |
| ASP65               | 3.16                      | 3.18                     | −0.02            |
| ASP66               | 3.88                      | 4.26                     | −0.38            |
| ASP67               | 2.88                      | 2.82                     | 0.06             |
| GLU69               | 4.14                      | 3.71                     | 0.43             |
| LYS70               | 10.3                      | 10.28                    | 0.02             |
| GLU73               | 4.74                      | 4.74                     | 0                |
| LYS84               | 10.24                     | 10.2                     | 0.04             |
| HIE87               | 5.48                      | 5.47                     | 0.01             |
| LYS88               | 10.72                     | 10.72                    | 0                |
| ARG96               | 12.41                     | 12.48                    | −0.07            |
| LYS97               | 9.78                      | 9.66                     | 0.12             |
| HIE100              | 6.53                      | 6.43                     | 0.1              |
| GLU102              | 4.09                      | 4.04                     | 0.05             |
| LYS104              | 10.25                     | 10.27                    | −0.02            |
| ARG108              | 12.82                     | 12.69                    | 0.13             |
| ARG113              | 12.31                     | 12.3                     | 0.01             |
| GLU114              | 5.02                      | 5.08                     | −0.06            |
| HIS119              | 6.89                      | 6.98                     | −0.09            |
| GLU120              | 3.78                      | 4.15                     | −0.37            |
| CYS121              | 11.61                     | 11.62                    | −0.01            |
| TYR125              | 9.93                      | 9.66                     | 0.27             |
| TYR130              | 12.17                     | 12.18                    | −0.01            |
| TYR134              | 10.25                     | 10.45                    | −0.2             |
| ASP136              | 4.04                      | 4.06                     | −0.02            |
| GLU138              | 4.8                       | 4.93                     | −0.13            |
| CYS142              | 12                        | 12.02                    | −0.02            |
| GLU144              | 4.56                      | 4.65                     | −0.09            |
| HIE145              | 4.95                      | 4.9                      | 0.05             |
| ASP147              | 3.09                      | 3.29                     | −0.2             |
| ASP152              | 3.7                       | 3.66                     | 0.04             |
| LYS156              | 10.54                     | 10.55                    | −0.01            |
| LYS157              | 10.36                     | 10.35                    | 0.01             |
| ARG160              | 11.9                      | 11.86                    | 0.04             |
| GLU163              | 3.64                      | 3.7                      | −0.06            |
| LYS168              | 9.67                      | 9.62                     | 0.05             |

|        |       |       |       |
|--------|-------|-------|-------|
| LYS175 | 10.96 | 11.02 | -0.06 |
| TYR179 | 11.15 | 11.41 | -0.26 |
| ARG181 | 12.32 | 12.13 | 0.19  |
| GLU182 | 4.79  | 4.82  | -0.03 |
| LYS183 | 10.48 | 10.45 | 0.03  |
| HIE184 | 5.65  | 5.27  | 0.38  |
| LYS185 | 7.95  | 7.76  | 0.19  |
| HIE188 | 6.29  | 6.13  | 0.16  |
| ARG189 | 10.82 | 10.54 | 0.28  |
| ASP190 | 4.7   | 4.74  | -0.04 |
| LYS192 | 9.86  | 9.87  | -0.01 |
| ARG201 | 12.16 | 12.14 | 0.02  |
| GLU203 | 2.84  | 3.06  | -0.22 |
| LYS205 | 10.94 | 10.8  | 0.14  |
| CYS207 | 11.44 | 11.68 | -0.24 |
| ASP208 | 2.61  | 2.26  | 0.35  |
| ASP217 | 4.3   | 4.29  | 0.01  |
| ARG227 | 13.12 | 13.02 | 0.1   |
| TYR229 | 9.46  | 9.56  | -0.1  |
| GLU233 | 4.28  | 3.72  | 0.56  |
| ARG234 | 13.08 | 12.91 | 0.17  |
| HIE239 | 6.4   | 6.38  | 0.02  |
| TYR240 | 9.88  | 9.99  | -0.11 |
| ASP245 | 5.69  | 6.46  | -0.77 |
| GLU255 | 6.05  | 6.1   | -0.05 |
| ARG260 | 12.1  | 11.97 | 0.13  |
| TYR261 | 11.3  | 11.3  | 0     |
| ASP267 | 3.52  | 3.45  | 0.07  |
| LYS269 | 10.53 | 10.52 | 0.01  |
| GLU270 | 4.71  | 4.73  | -0.02 |
| GLU272 | 4.73  | 4.74  | -0.01 |
| CYS277 | 9.17  | 9.19  | -0.02 |
| ARG305 | 12    | 12    | 0     |
| GLU312 | 3.99  | 3.99  | 0     |
| ASP315 | 4.1   | 4.16  | -0.06 |
| TYR316 | 10.76 | 10.83 | -0.07 |
| GLU320 | 4.65  | 4.68  | -0.03 |
| LYS324 | 10.2  | 10.15 | 0.05  |
| GLU333 | 3.26  | 3.42  | -0.16 |
| ASP336 | 2.41  | 2.73  | -0.32 |
| LYS340 | 11.21 | 10.82 | 0.39  |
| CYS341 | 12.6  | 12.51 | 0.09  |
| LYS344 | 10.02 | 9.99  | 0.03  |
| GLU348 | 4.66  | 4.64  | 0.02  |
| ARG349 | 11.13 | 11.14 | -0.01 |
| ASP351 | 2.37  | 2.92  | -0.55 |
| LYS353 | 11.54 | 11.16 | 0.38  |
| HIE358 | 6.03  | 6.04  | -0.01 |
| LYS362 | 10.34 | 10.3  | 0.04  |
| ARG363 | 14.77 | 14.17 | 0.6   |
| ASP365 | 3.73  | 3.89  | -0.16 |
| GLU367 | 4.07  | 4.44  | -0.37 |
| GLU368 | 4.53  | 4.53  | 0     |
| ASP370 | 3.37  | 3.41  | -0.04 |
| CYS376 | 9.74  | 9.5   | 0.24  |

**Table S2.** Compounds used for validation of docking and RF-Score-VS.

| Compounds Name | Docking Score<br>(kcal/mol) | RF-Score-VS | Activity (nm) | Type   |
|----------------|-----------------------------|-------------|---------------|--------|
| CHEMBL33906    | -9.821                      | 5.958       | 47            | Active |
| CHEMBL30790    | -9.672                      | 6.004       | 14            | Active |

|              |        |       |     |        |
|--------------|--------|-------|-----|--------|
| CHEMBL281662 | -9.396 | 6.125 | 18  | Active |
| CHEMBL31143  | -9.353 | 6.003 | 20  | Active |
| CHEMBL287959 | -9.23  | 5.994 | 76  | Active |
| CHEMBL214683 | -9.165 | 6.062 | 43  | Active |
| CHEMBL34072  | -9.085 | 5.953 | 25  | Active |
| CHEMBL290886 | -8.916 | 5.964 | 55  | Active |
| CHEMBL216832 | -8.823 | 6.085 | 44  | Active |
| CHEMBL31497  | -8.655 | 6.19  | 26  | Active |
| CHEMBL217130 | -8.532 | 5.97  | 100 | Active |
| CHEMBL282361 | -8.519 | 5.975 | 21  | Active |
| CHEMBL34436  | -8.444 | 5.983 | 170 | Active |
| CHEMBL320688 | -8.442 | 6.102 | 212 | Active |
| CHEMBL535    | -7.798 | 5.972 | 130 | Active |
| CHEMBL31639  | -7.508 | 6     | 160 | Active |
| CHEMBL201833 | -7.22  | 6.072 | 386 | Active |
| CHEMBL436137 | -7.118 | 6.074 | 69  | Active |
| CHEMBL37548  | -6.838 | 5.956 | 540 | Active |
| CHEMBL422940 | -6.612 | 5.97  | 410 | Active |
| CHEMBL329492 | -6.587 | 6.06  | 300 | Active |
| CHEMBL380328 | -5.746 | 5.996 | 410 | Active |
| CHEMBL201384 | -5.551 | 6.105 | 361 | Active |
| CHEMBL382616 | -5.544 | 6.139 | 168 | Active |
| CHEMBL322395 | -4.99  | 6.136 | 280 | Active |
| ZINC00104965 | -3.665 | 5.979 | -   | Decoy  |
| ZINC00302473 | -5.494 | 5.96  | -   | Decoy  |
| ZINC00510305 | -6.082 | 5.973 | -   | Decoy  |
| ZINC01311479 | -4.827 | 5.963 | -   | Decoy  |
| ZINC01808151 | -6.417 | 5.979 | -   | Decoy  |
| ZINC02356139 | -5.859 | 5.972 | -   | Decoy  |
| ZINC02474446 | -5.235 | 5.96  | -   | Decoy  |
| ZINC03173966 | -2.574 | 5.956 | -   | Decoy  |
| ZINC04268246 | -5.063 | 5.962 | -   | Decoy  |
| ZINC04685857 | -6.638 | 5.961 | -   | Decoy  |
| ZINC05275925 | -6.043 | 5.966 | -   | Decoy  |
| ZINC05276752 | -2.923 | 5.964 | -   | Decoy  |
| ZINC05463577 | -3.581 | 5.968 | -   | Decoy  |
| ZINC05833428 | -4.762 | 5.96  | -   | Decoy  |
| ZINC05833428 | -3.559 | 5.958 | -   | Decoy  |
| ZINC05941968 | -6.446 | 5.974 | -   | Decoy  |
| ZINC06418307 | -5.699 | 5.967 | -   | Decoy  |
| ZINC06419602 | -2.972 | 5.958 | -   | Decoy  |
| ZINC06529050 | -6.323 | 5.972 | -   | Decoy  |
| ZINC06584512 | -6.402 | 5.968 | -   | Decoy  |
| ZINC06685196 | -5.916 | 5.971 | -   | Decoy  |
| ZINC09446432 | -6.158 | 5.959 | -   | Decoy  |
| ZINC11294859 | -5.919 | 5.968 | -   | Decoy  |
| ZINC13130028 | -4.542 | 5.963 | -   | Decoy  |
| ZINC13130028 | -5.457 | 5.958 | -   | Decoy  |
| ZINC13262863 | -4.169 | 5.956 | -   | Decoy  |
| ZINC13523686 | -3.452 | 5.957 | -   | Decoy  |
| ZINC14271552 | -6.661 | 5.977 | -   | Decoy  |
| ZINC14460259 | -4.748 | 5.971 | -   | Decoy  |
| ZINC14547785 | -6.253 | 5.96  | -   | Decoy  |
| ZINC14806183 | -4.482 | 5.973 | -   | Decoy  |
| ZINC17002670 | -2.431 | 5.965 | -   | Decoy  |
| ZINC17054333 | -6.416 | 5.961 | -   | Decoy  |
| ZINC18196734 | -3.918 | 5.96  | -   | Decoy  |
| ZINC19767181 | -6.57  | 5.975 | -   | Decoy  |
| ZINC20343524 | -6.42  | 5.964 | -   | Decoy  |
| ZINC21238631 | -5.073 | 5.967 | -   | Decoy  |
| ZINC26895232 | -6.396 | 5.963 | -   | Decoy  |
| ZINC30884190 | -5.167 | 5.963 | -   | Decoy  |

|              |        |       |   |       |
|--------------|--------|-------|---|-------|
| ZINC35276985 | -6.088 | 5.972 | - | Decoy |
| ZINC35698004 | -5.537 | 5.958 | - | Decoy |
| ZINC37452574 | -5.498 | 5.958 | - | Decoy |
| ZINC37552340 | -3.395 | 5.962 | - | Decoy |
| ZINC39280364 | -5.187 | 5.972 | - | Decoy |
| ZINC39465282 | -6.358 | 5.959 | - | Decoy |
| ZINC40282812 | -5.544 | 5.959 | - | Decoy |
| ZINC40338438 | -6.341 | 5.961 | - | Decoy |
| ZINC40728537 | -2.493 | 5.967 | - | Decoy |
| ZINC42175424 | -5.278 | 5.957 | - | Decoy |
| ZINC42652324 | -6.421 | 5.957 | - | Decoy |
| ZINC43554560 | -5.503 | 5.969 | - | Decoy |
| ZINC43666562 | -6.276 | 5.968 | - | Decoy |
| ZINC43666583 | -4.237 | 5.957 | - | Decoy |
| ZINC43668535 | -6.076 | 5.958 | - | Decoy |
| ZINC44069419 | -5.471 | 5.96  | - | Decoy |
| ZINC44888470 | -6.526 | 5.963 | - | Decoy |
| ZINC45112290 | -6.361 | 5.958 | - | Decoy |
| ZINC45728136 | -7.393 | 5.979 | - | Decoy |
| ZINC49067143 | -3.803 | 5.963 | - | Decoy |
| ZINC50306995 | -6.372 | 5.973 | - | Decoy |
| ZINC51036903 | -5.935 | 5.959 | - | Decoy |
| ZINC51088673 | -6.433 | 5.961 | - | Decoy |
| ZINC52902235 | -5.997 | 5.96  | - | Decoy |
| ZINC55179637 | -6.667 | 5.963 | - | Decoy |
| ZINC57316590 | -8.039 | 5.96  | - | Decoy |
| ZINC58279609 | -4.188 | 5.97  | - | Decoy |
| ZINC58279616 | -6.008 | 5.964 | - | Decoy |
| ZINC58279785 | -4.669 | 5.965 | - | Decoy |
| ZINC61534036 | -6.278 | 5.962 | - | Decoy |
| ZINC61589830 | -6.541 | 5.974 | - | Decoy |
| ZINC61819155 | -6.334 | 5.961 | - | Decoy |
| ZINC62766937 | -5.291 | 5.961 | - | Decoy |
| ZINC62843866 | -6.155 | 5.958 | - | Decoy |
| ZINC62870625 | -4.95  | 5.966 | - | Decoy |
| ZINC66739067 | -4.906 | 5.967 | - | Decoy |

**Table S3.** Multiple screening analysis of the compounds against MEK1.

| Compound ID | Docking Score (kcal/mol) |        |        | RF-Score-VS | Tanimoto Coefficient |
|-------------|--------------------------|--------|--------|-------------|----------------------|
|             | Site 1                   | Site 2 | Site 3 |             |                      |
| Reference   | -3.423                   | -1.706 | -3.65  | 6.656       |                      |
| DB00147     | -6.382                   | -6.709 | -4.149 | 7.098       | 0.614278103          |
| DB00168     | -6.582                   | -3.431 | -4.283 | 7.103       | 0.676993398          |
| DB00190     | -9.839                   | -6.646 | -6.306 | 7.105       | 0.684580613          |
| DB00816     | -7.836                   | -4.489 | -3.763 | 7.1         | 0.636269964          |
| DB00871     | -8.309                   | -4.796 | -3.834 | 7.1         | 0.636269964          |
| DB01088     | -7.395                   | -4.438 | -5.369 | 7.101       | 0.667546174          |
| DB01157     | -6.278                   | -4.591 | -5.726 | 7.098       | 0.616965227          |
| DB01291     | -7                       | -6.408 | -4.595 | 7.099       | 0.634309194          |
| DB01634     | -6.625                   | -5.758 | -4.947 | 7.098       | 0.606076759          |
| DB01685     | -6.757                   | -4.354 | -4.112 | 7.098       | 0.616965227          |
| DB01758     | -8.801                   | -6.65  | -5.717 | 7.098       | 0.634121274          |
| DB01771     | -7.775                   | -4.624 | -4.958 | 7.098       | 0.634121274          |
| DB02041     | -7.438                   | -4.049 | -4.927 | 7.098       | 0.634121274          |
| DB02088     | -6.953                   | -3.715 | -4.92  | 7.117       | 0.707329317          |
| DB02142     | -7.657                   | -6.217 | -5.27  | 7.098       | 0.603510583          |
| DB02209     | -8.651                   | -9.064 | -5.669 | 7.099       | 0.635107472          |
| DB02215     | -7.442                   | -4.439 | -3.648 | 7.098       | 0.601807549          |
| DB02256     | -7.709                   | -5.649 | -3.976 | 7.1         | 0.655995935          |
| DB02268     | -7.385                   | -4.7   | -5.493 | 7.105       | 0.687088608          |
| DB02366     | -7.427                   | -3.644 | -5.082 | 7.098       | 0.631876607          |

|                |               |               |               |              |                    |
|----------------|---------------|---------------|---------------|--------------|--------------------|
| DB02408        | -6.205        | -3.61         | -6.334        | 7.098        | 0.600620797        |
| DB02475        | -6.914        | -5.321        | -3.746        | 7.098        | 0.631551901        |
| DB02652        | -7.502        | -4.803        | -5.248        | 7.103        | 0.681725888        |
| DB02709        | -7.091        | -5.624        | -4.745        | 7.128        | 0.709984947        |
| DB02725        | -6.527        | -5.823        | -4.117        | 7.098        | 0.631551901        |
| DB02842        | -6.339        | -5.758        | -4.658        | 7.098        | 0.631551901        |
| DB02849        | -8.72         | -7.285        | -5.801        | 7.1          | 0.667002519        |
| DB02989        | -7.364        | -3.901        | -4.831        | 7.098        | 0.63062597         |
| DB03037        | -9.307        | -5.124        | -5.808        | 7.108        | 0.691612255        |
| DB03285        | -8.281        | -5.81         | -5.772        | 7.105        | 0.684580613        |
| DB04058        | -7.813        | -4.262        | -5.227        | 7.103        | 0.681564246        |
| DB04169        | -7.527        | -4.138        | -5.075        | 7.098        | 0.625527426        |
| DB04241        | -8.469        | -5.572        | -6.386        | 7.1          | 0.655789474        |
| DB04267        | -7.67         | -4.665        | -4.78         | 7.1          | 0.655789474        |
| DB04324        | -6.833        | -4.768        | -4.102        | 7.1          | 0.639504899        |
| DB04598        | -7.143        | -5.346        | -5.574        | 7.126        | 0.707329317        |
| DB06255        | -10.304       | -6.508        | -6.288        | 7.1          | 0.65394402         |
| DB06397        | -6.676        | -3.995        | -4.589        | 7.098        | 0.615995763        |
| DB06529        | -7.131        | -3.654        | -3.81         | 7.098        | 0.615995763        |
| DB06762        | -6.674        | -3.904        | -4.056        | 7.098        | 0.610115911        |
| DB06819        | -6.25         | -4.127        | -4.447        | 7.103        | 0.677664975        |
| DB06832        | -7.715        | -4.441        | -4.752        | 7.099        | 0.635107472        |
| DB06873        | -6.334        | -3.907        | -4.815        | 7.1          | 0.660030628        |
| DB06997        | -6.582        | -3.818        | -5.672        | 7.098        | 0.623777663        |
| DB07125        | -8.416        | -4.498        | -5.051        | 7.098        | 0.623667377        |
| DB07177        | -6.989        | -5.47         | -4.796        | 7.103        | 0.680786687        |
| DB07546        | -6.456        | -5.852        | -4.423        | 7.098        | 0.623188406        |
| <b>DB07642</b> | <b>-6.174</b> | <b>-7.065</b> | <b>-6.817</b> | <b>7.098</b> | <b>0.622313204</b> |
| DB07718        | -7.426        | -5.062        | -5.071        | 7.105        | 0.684580613        |
| DB07773        | -9.256        | -5.543        | -5.521        | 7.1          | 0.654545455        |
| DB07795        | -9.253        | -5.545        | -5.643        | 7.1          | 0.65394402         |
| DB07854        | -8.951        | -4.224        | -4.168        | 7.098        | 0.620600414        |
| DB07855        | -8.871        | -3.969        | -4.218        | 7.098        | 0.620600414        |
| DB08191        | -8.376        | -4.259        | -5.016        | 7.098        | 0.620298815        |
| DB08251        | -11.98        | -5.367        | -4.919        | 7.1          | 0.655789474        |
| DB08350        | -7.279        | -5.485        | -3.922        | 7.098        | 0.620298815        |
| DB08523        | -6.131        | -4.084        | -4.329        | 7.104        | 0.684343434        |
| DB08660        | -9.369        | -7.006        | -6.804        | 7.105        | 0.684580613        |
| DB08846        | -10.807       | -5.335        | -6.228        | 7.1          | 0.65394402         |
| DB11673        | -6.215        | -5.389        | -4.369        | 7.098        | 0.615995763        |
| DB11830        | -6.173        | -5.165        | -4.774        | 7.108        | 0.695585997        |
| <b>DB12661</b> | <b>-7.051</b> | <b>-7.569</b> | <b>-6.982</b> | <b>7.098</b> | <b>0.615995763</b> |
| DB12818        | -8.106        | -6.325        | -4.401        | 7.1          | 0.651553744        |
| DB12847        | -6.716        | -6.128        | -4.515        | 7.098        | 0.615942029        |
| DB13174        | -9.287        | -7.87         | -5.633        | 7.1          | 0.65394402         |
| DB13421        | -8.6          | -6.357        | -4.412        | 7.103        | 0.681725888        |

Highlighted compound indicates the lead compound considered in this analysis.

**Table S4.** Three-fold validation on glide docking analysis of hit compounds.

| Compounds  | 1st Iteration | 2nd Iteration | 3rd Iteration | Average Docking Score<br>(kcal/mol) |
|------------|---------------|---------------|---------------|-------------------------------------|
| Trametinib | -3.423        | -4.153        | -2.76         | -3.445                              |
| DB08251    | -11.98        | -12.371       | -12.358       | -12.23                              |
| DB13174    | -9.287        | -9.62         | -10.667       | -9.858                              |
| DB07773    | -9.256        | -9.205        | -9.207        | -9.222                              |
| DB02849    | -8.72         | -9.038        | -9.038        | -8.932                              |
| DB04241    | -8.469        | -8.614        | -8.16         | -8.414                              |
| DB07125    | -8.416        | -8.207        | -8.117        | -8.246                              |
| DB01771    | -7.775        | -7.346        | -7.346        | -7.489                              |
| DB02366    | -7.427        | -7.241        | -7.139        | -7.269                              |
| DB02709    | -7.091        | -7.134        | -7.062        | -7.095                              |

|         |        |        |        |        |
|---------|--------|--------|--------|--------|
| DB12661 | -7.051 | -7.062 | -7.029 | -7.043 |
| DB07177 | -6.989 | -6.754 | -6.982 | -6.90  |
| DB12847 | -6.716 | -6.152 | -6.152 | -6.34  |
| DB07546 | -6.456 | -5.874 | -5.874 | -6.068 |
| DB07642 | -6.174 | -5.827 | -5.827 | -5.942 |

**Table S5.** Molecular docking and binding free energy calculations of top hit compounds against PIM1 receptor.

| Compounds Name | Docking Score<br>(kcal/mol) | $\Delta G_{\text{Bind}}$<br>(kcal/mol) | $\Delta G_{\text{Bind}}$<br>Coulomb | $\Delta G_{\text{Bind}}$<br>Hbond | $\Delta G_{\text{Bind}}$<br>Solv GB | $\Delta G_{\text{Bind}}$<br>vdW | Lig Strain<br>Energy |
|----------------|-----------------------------|----------------------------------------|-------------------------------------|-----------------------------------|-------------------------------------|---------------------------------|----------------------|
| KZ-02          | -4.892                      | -50.61                                 | 30.58                               | -1.22                             | 12.05                               | -44.55                          | 6.55                 |
| DB012611       | -5.594                      | -68.29                                 | -18.72                              | -3.12                             | 36.37                               | -42.29                          | 13.013               |
| DB07642        | -5.502                      | -55.97                                 | -12.58                              | -2.73                             | 32.97                               | -38.67                          | 7.522                |

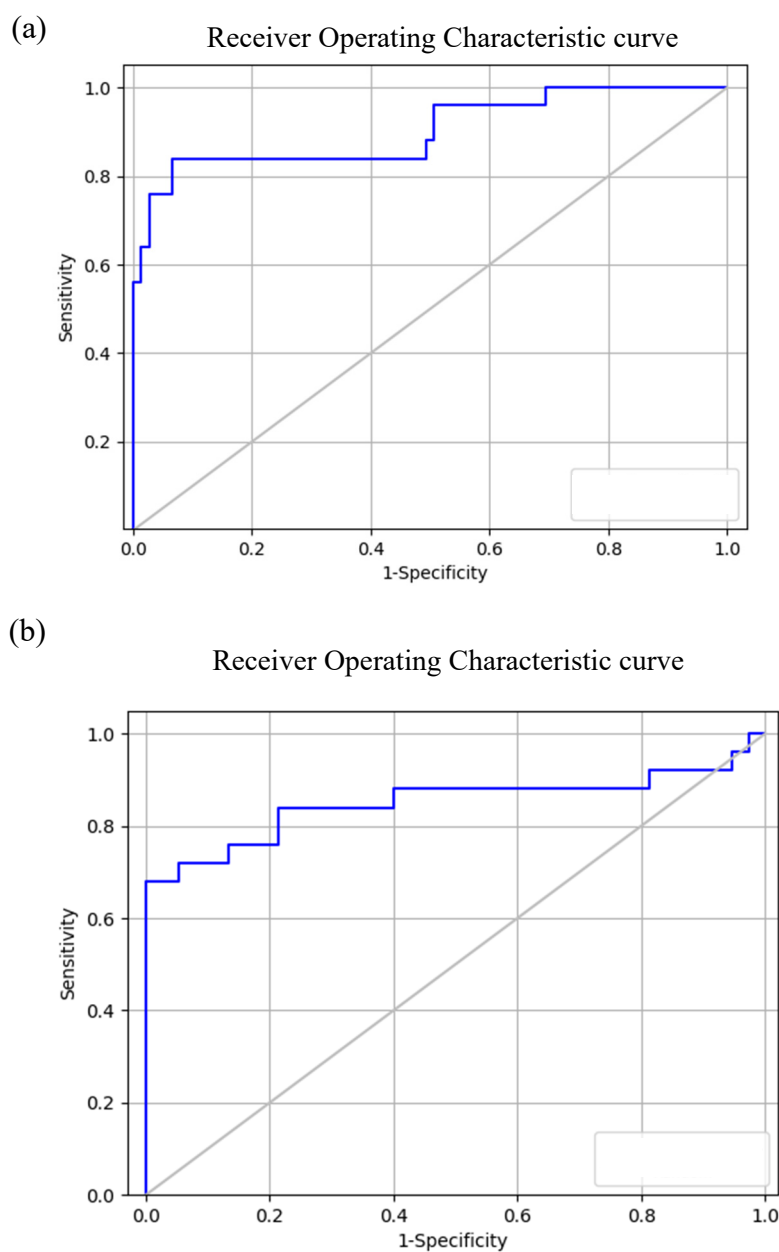

**Figure S1.** ROC analysis of screening methods. (a) Docking; (b) RF-Score-VS.

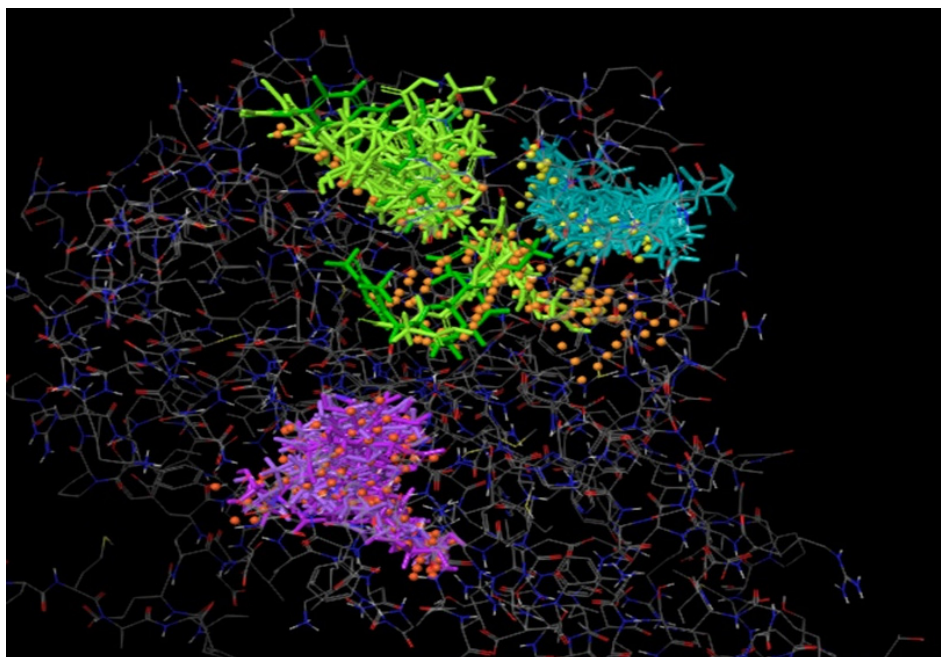

**Figure S2.** Binding frequency of the ligand molecules on top three predicted binding sites. The coloured dots represent the binding sites: site 1 (red), site 2 (orange), and site 3 (yellow). The coloured chemical structures depict molecules binding positions on various binding sites. Ligand bound in site 1 (purple); site 2 (green); site 3 (sky blue).

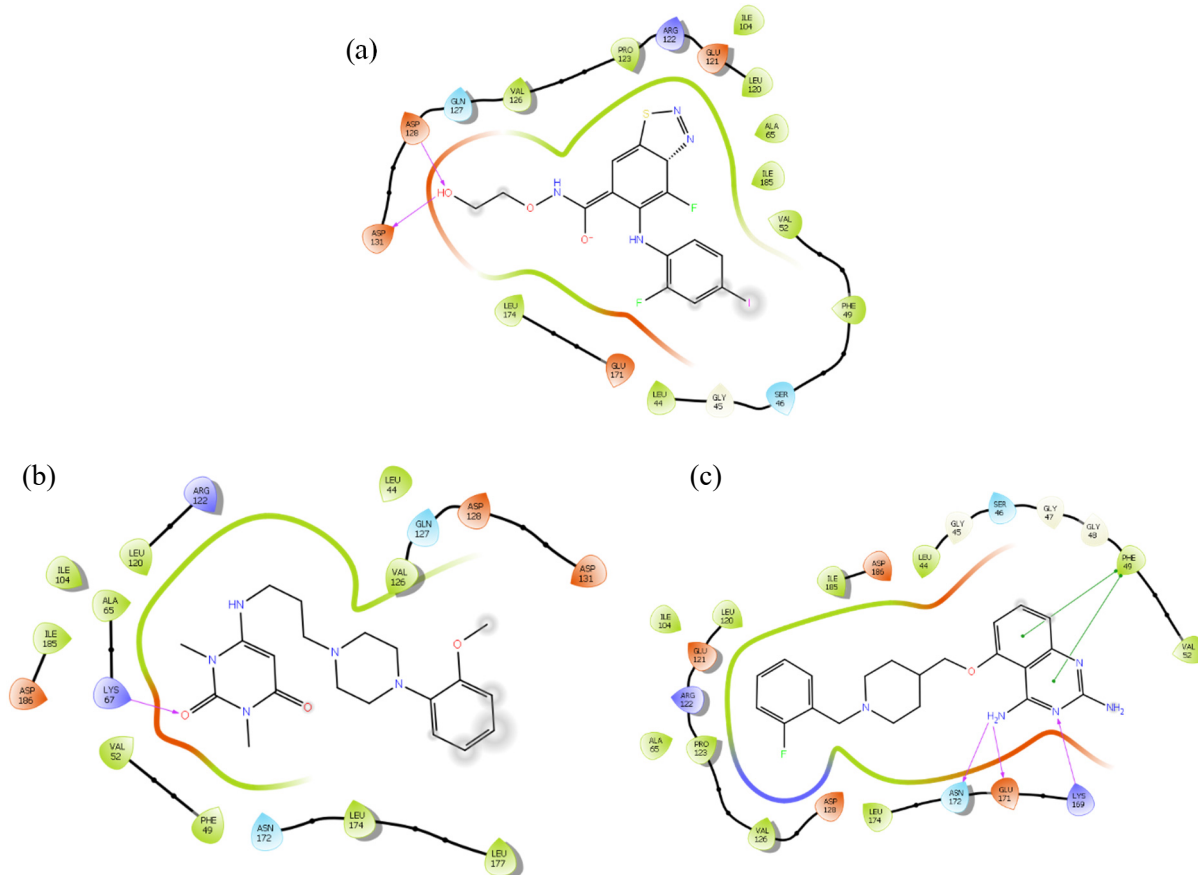

**Figure S3.** Ligand interaction diagram of hit compounds (a) KZ-02 (Reference); (b) DB012661; (c) DB07642 with PIM1 receptor.

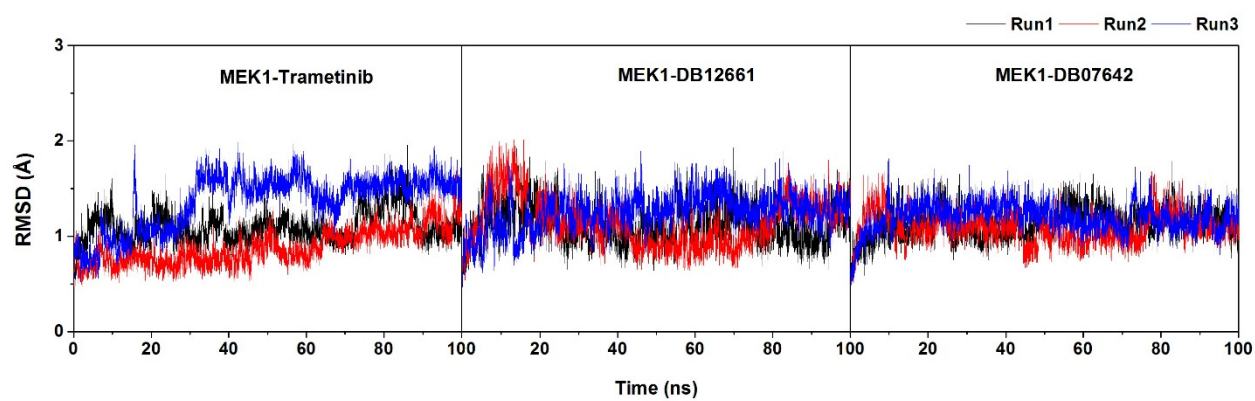

**Figure S4.** Root-mean-square displacement (RMSD) plot for the backbone amino acid residues within a 5-Å sphere around the ligand. The data were derived from the three independent runs with different initial velocities.
